# Supplementary material for: Changes in the Choroidal Thickness following Intravitreal Bevacizumab Injection in Chronic Central Serous Chorioretinopathy
Source: MDPI journal article supplement (doi:10.3390/jcm11123375), 2022-06-13
Supplement: s1 [file s1]

**Table S1. Changes in the Choroidal Thickness following Intravitreal Bevacizumab Injection in Chronic Central Serous Chorioretinopathy**

Yoo-Ri Chung, Su Jeong Lee, Ji Hun Song  
Department of Ophthalmology, Ajou University School of Medicine, Suwon, Republic of Korea

Corresponding author: Ji Hun Song, MD, PhD  
Department of Ophthalmology, Ajou University School of Medicine, 164 World Cup-ro, Yeongtong-gu, 16499 Suwon, Republic of Korea

| Included eye | Age (years) | Sex<br>(1:M, 2:F) | HTN<br>(0: no, 1: yes) | Smoking<br>(0:no, 1: yes) | Group<br>(1: Refractory,<br>2: Resolved) | FA leakage<br>(0: no, 1: yes) | Pre VA | Pre VA (logMAR) | Pre CRT (μm) | Pre SFCT (μm) | 1Mo VA | 1Mo VA (logMAR) | 1Mo CRT (μm) | 1Mo SFCT (μm) | Last VA | Last VA (logMAR) | Last CRT (μm) | Last SFCT (μm) | F/U period<br>(months) | No. of IVB<br>for resolution | Total No. of IVB |
|--------------|-------------|-------------------|------------------------|---------------------------|------------------------------------------|-------------------------------|--------|-----------------|--------------|---------------|--------|-----------------|--------------|---------------|---------|------------------|---------------|----------------|------------------------|------------------------------|------------------|
| 1            | 49          | 1                 | 0                      | 1                         | 2                                        | 1                             | 0.32   | 0.4949          | 689          | 484           | 0.5    | 0.301           | 168          | 403           | 0.63    | 0.2007           | 206           | 402            | 30                     | 1                            | 5                |
| 2            | 51          | 2                 | 0                      | 0                         | 2                                        | 0                             | 0.2    | 0.699           | 417          | 228           | 0.25   | 0.6021          | 165          | 212           | 0.4     | 0.3979           | 182           | 223            | 36                     | 2                            | 3                |
| 3            | 42          | 1                 | 0                      | 0                         | 2                                        | 0                             | 1      | 0               | 318          | 381           | 1      | 0               | 206          | 382           | 1       | 0                | 245           | 360            | 26                     | 5                            | 6                |
| 4            | 49          | 1                 | 0                      |                           | 2                                        | 1                             | 0.8    | 0.0969          | 294          | 357           | 1      | 0               | 272          | 376           | 1       | 0                | 199           | 290            | 12                     | 5                            | 5                |
| 5            | 63          | 1                 | 1                      | 1                         | 2                                        | 0                             | 0.32   | 0.4949          | 485          | 409           | 0.25   | 0.6021          | 188          | 303           | 0.2     | 0.699            | 347           | 319            | 19                     | 3                            | 5                |
| 6            | 53          | 2                 | 1                      | 0                         | 1                                        | 1                             | 0.4    | 0.3979          | 296          | 538           | 0.5    | 0.301           | 192          | 672           | 0.25    | 0.6021           | 254           | 575            | 28                     |                              | 15               |
| 7            | 56          | 1                 | 0                      |                           | 2                                        | 0                             | 0.32   | 0.4949          | 352          | 412           | 0.5    | 0.301           | 217          | 394           | 1       | 0                | 225           | 413            | 13                     | 6                            | 6                |
| 8            | 52          | 1                 | 0                      | 0                         | 2                                        | 1                             | 0.32   | 0.4949          | 266          | 352           | 0.32   | 0.4949          | 217          | 343           | 0.32    | 0.4949           | 253           | 239            | 30                     | 3                            | 8                |
| 9            | 41          | 1                 | 0                      |                           | 2                                        | 0                             | 1      | 0               | 287          | 434           | 1      | 0               | 256          | 466           | 1       | 0                | 282           | 378            | 23                     | 1                            | 1                |
| 10           | 49          | 1                 | 0                      |                           | 2                                        | 0                             | 0.32   | 0.4949          | 249          | 321           | 1      | 0               | 241          | 330           | 1       | 0                | 231           | 306            | 3                      | 1                            | 1                |
| 11           | 37          | 1                 | 0                      | 1                         | 2                                        | 0                             | 1      | 0               | 537          | 400           | 1      | 0               | 193          | 371           | 1       | 0                | 207           | 384            | 8                      | 1                            | 2                |
| 12           | 50          | 1                 | 0                      | 0                         | 2                                        | 1                             | 0.63   | 0.2007          | 406          | 383           | 0.63   | 0.2007          | 191          | 377           | 1       | 0                | 232           | 373            | 6                      | 1                            | 2                |
| 13           | 52          | 1                 | 1                      | 0                         | 1                                        | 1                             | 0.13   | 0.9031          | 542          | 490           | 0.25   | 0.6021          | 258          | 454           | 0.2     | 0.699            | 427           | 450            | 6                      |                              | 3                |
| 14           | 44          | 1                 | 0                      |                           | 2                                        | 0                             | 0.5    | 0.301           | 245          | 280           | 0.63   | 0.2007          | 233          | 285           | 0.5     | 0.301            | 232           | 286            | 10                     | 4                            | 4                |
| 15           | 57          | 1                 | 1                      | 1                         | 2                                        | 0                             | 0.5    | 0.301           | 393          | 426           | 0.5    | 0.301           | 199          | 393           | 0.8     | 0.0969           | 229           | 383            | 8                      | 2                            | 2                |
| 16           | 45          | 1                 | 0                      | 1                         | 2                                        | 1                             | 0.2    | 0.699           | 454          | 577           | 0.2    | 0.699           | 274          | 582           | 0.13    | 0.9031           | 304           | 659            | 14                     | 5                            | 7                |
| 17           | 48          | 1                 | 0                      | 1                         | 2                                        | 1                             | 0.5    | 0.301           | 357          | 363           | 0.63   | 0.2007          | 262          | 425           | 0.63    | 0.2007           | 81            | 361            | 13                     | 3                            | 4                |
| 18           | 37          | 1                 | 0                      | 0                         | 1                                        | 0                             | 0.05   | 1.301           | 387          | 380           | 0.05   | 1.301           | 422          | 455           | 0.02    | 1.699            | 542           | 404            | 23                     |                              | 1                |
| 19           | 49          | 1                 | 0                      | 1                         | 2                                        | 0                             | 0.32   | 0.4949          | 313          | 278           | 0.63   | 0.2007          | 122          | 261           | 0.25    | 0.6021           | 145           | 248            | 51                     | 3                            | 10               |
| 20           | 43          | 2                 | 0                      | 0                         | 2                                        | 1                             | 1      | 0               | 439          | 474           | 1      | 0               | 532          | 485           | 0.32    | 0.4949           | 362           | 394            | 40                     | 5                            | 12               |
| 21           | 43          | 2                 | 0                      | 0                         | 2                                        | 1                             | 0.25   | 0.6021          | 227          | 408           | 0.4    | 0.3979          | 329          | 401           | 0.25    | 0.6021           | 271           | 375            | 50                     | 8                            | 24               |
| 22           | 50          | 1                 | 0                      | 1                         | 2                                        | 1                             | 1      | 0               | 556          | 443           | 1      | 0               | 262          | 425           | 0.8     | 0.0969           | 197           | 354            | 15                     | 4                            | 6                |
| 23           | 43          | 1                 | 0                      |                           | 2                                        | 0                             | 0.63   | 0.2007          | 587          | 461           | 0.63   | 0.2007          | 362          | 202           | 0.63    | 0.2007           | 211           | 524            | 7                      | 2                            | 2                |
| 24           | 60          | 1                 | 1                      |                           | 1                                        | 0                             | 0.5    | 0.301           | 270          | 530           | 0.5    | 0.301           | 225          | 498           | 0.63    | 0.2007           | 267           | 516            | 6                      |                              | 1                |
| 25           | 45          | 1                 | 0                      | 1                         | 2                                        | 0                             | 1      | 0               | 369          | 526           | 1      | 0               | 255          | 358           | 1       | 0                | 367           | 558            | 7                      | 1                            | 2                |
| 26           | 51          | 2                 | 0                      | 0                         | 2                                        | 0                             | 0.5    | 0.301           | 311          | 274           | 0.63   | 0.2007          | 136          | 269           | 0.25    | 0.6021           | 161           | 243            | 50                     | 2                            | 5                |
| 27           | 58          | 2                 | 0                      | 0                         | 2                                        | 1                             | 0.8    | 0.0969          | 538          | 531           | 0.5    | 0.301           | 430          | 522           | 0       | 0.3979           | 176           | 448            | 6                      | 3                            | 3                |
| 28           | 51          | 1                 | 0                      | 1                         | 2                                        | 1                             | 0.2    | 0.699           | 441          | 474           | 0.5    | 0.301           | 145          | 384           | 0.9     | 0.0458           | 184           | 384            | 16                     | 1                            | 3                |
| 29           | 51          | 1                 | 0                      | 1                         | 1                                        | 0                             | 1      | 0               | 220          | 564           | 1      | 0               | 201          | 654           | 0.5     | 0.301            | 426           | 616            | 22                     |                              | 5                |
| 30           | 46          | 2                 | 0                      | 0                         | 2                                        | 1                             | 1      | 0               | 220          | 498           | 1      | 0               | 188          | 406           | 1       | 0                | 216           | 329            | 42                     | 2                            | 4                |
| 31           | 43          | 1                 | 0                      | 0                         | 2                                        | 0                             | 1      | 0               | 314          | 523           | 1      | 0               | 176          | 526           | 1       | 0                | 191           | 494            | 53                     | 2                            | 20               |
| 32           | 71          | 1                 | 0                      | 0                         | 2                                        | 1                             | 0.25   | 0.6021          | 417          | 363           | 0.63   | 0.2007          | 202          | 386           | 0.5     | 0.301            | 187           | 278            | 3                      | 1                            | 1                |
| 33           | 67          | 1                 | 1                      | 0                         | 1                                        | 0                             | 0.32   | 0.4949          | 290          | 218           | 0.2    | 0.699           | 352          | 225           | 0.2     | 0.699            | 354           | 237            | 4                      |                              | 3                |
| 34           | 62          | 2                 | 0                      | 0                         | 2                                        | 0                             | 0.25   | 0.6021          | 320          | 360           | 0.4    | 0.3979          | 228          | 351           | 0.4     | 0.3979           | 228           | 351            | 3                      | 2                            | 2                |
| 35           | 54          | 1                 | 0                      | 1                         | 2                                        | 0                             | 1      | 0               | 466          | 251           | 1      | 0               | 229          | 227           | 1       | 0                | 265           | 234            | 5                      | 1                            | 1                |
| 36           | 45          | 1                 | 0                      |                           | 2                                        | 1                             | 0.5    | 0.301           | 284          | 351           | 0.5    | 0.301           | 266          | 320           | 1       | 0                | 225           | 377            | 4                      | 1                            | 1                |
| 37           | 62          | 1                 | 0                      |                           | 1                                        | 1                             | 0.16   | 0.7959          | 728          | 238           | 0.32   | 0.4949          | 186          | 261           | 0.2     | 0.699            | 277           | 243            | 3                      |                              | 4                |
| 38           | 65          | 1                 | 0                      | 0                         | 2                                        | 0                             | 0.63   | 0.2007          | 485          | 363           | 1      | 0               | 278          | 369           | 1       | 0                | 369           | 349            | 13                     | 5                            | 5                |
| 39           | 45          | 1                 | 0                      | 1                         | 2                                        | 0                             | 0.4    | 0.3979          | 351          | 407           | 0.4    | 0.3979          | 186          | 437           | 0.4     | 0.3979           | 186           | 437            | 2                      | 1                            | 1                |
| 40           | 42          | 1                 | 0                      | 1                         | 2                                        | 0                             | 0.5    | 0.301           | 194          | 642           | 0.25   | 0.6021          | 194          | 642           | 0.5     | 0.301            | 222           | 600            | 10                     | 4                            | 6                |
| 41           | 46          | 2                 | 0                      | 0                         | 2                                        | 1                             | 0.2    | 0.699           | 773          | 625           | 0.2    | 0.699           | 630          |               | 1       | 0                | 224           | 507            | 5                      | 3                            | 3                |
| 42           | 40          | 1                 | 1                      |                           | 1                                        | 1                             | 1      | 0               | 297          | 424           | 1      | 0               | 288          | 432           | 1       | 0                | 367           | 485            | 7                      |                              | 5                |
| 43           | 60          | 2                 | 0                      | 0                         | 1                                        | 1                             | 0.4    | 0.3979          | 353          | 263           | 0.63   | 0.2007          | 362          | 262           | 0.63    | 0.2007           | 314           | 253            | 5                      |                              | 5                |
| 44           | 47          | 1                 | 0                      | 1                         | 2                                        | 1                             | 0.8    | 0.0969          | 506          | 383           | 1      | 0               | 251          | 400           | 1       | 0                | 287           | 439            | 5                      | 3                            | 3                |
| 45           | 60          | 1                 | 0                      |                           | 2                                        | 1                             | 0.25   | 0.6021          | 378          | 324           | 0.4    | 0.3979          | 252          | 274           | 0.32    | 0.4949           | 244           | 231            | 9                      | 1                            | 3                |
| 46           | 57          | 2                 | 0                      |                           | 2                                        | 0                             | 0.32   | 0.4949          | 341          | 372           | 1      | 0               | 197          | 362           | 1       | 0                | 197           | 362            | 1                      | 1                            | 1                |

|    |    |   |   |   |   |   |      |        |     |     |      |        |     |     |      |        |     |     |    |   |   |
|----|----|---|---|---|---|---|------|--------|-----|-----|------|--------|-----|-----|------|--------|-----|-----|----|---|---|
| 47 | 39 | 1 | 0 | 0 | 2 | 0 | 1    | 0      | 528 | 363 | 0.8  | 0.0969 | 333 | 386 | 1    | 0      | 237 | 372 | 3  | 2 | 2 |
| 48 | 58 | 1 | 0 | 0 | 2 | 0 | 0.5  | 0.301  | 264 | 352 | 0.63 | 0.2007 | 165 | 360 | 1    | 0      | 163 | 348 | 4  | 1 | 1 |
| 49 | 57 | 1 | 1 |   | 2 | 0 | 0.5  | 0.301  | 286 | 461 | 0.5  | 0.301  | 211 | 462 | 0.5  | 0.301  | 211 | 457 | 3  | 1 | 2 |
| 50 | 47 | 1 | 1 | 0 | 1 | 1 | 0.4  | 0.3979 | 355 | 299 | 0.63 | 0.2007 | 316 | 303 | 1    | 0      | 266 | 303 | 2  |   | 2 |
| 51 | 46 | 1 | 0 | 1 | 1 | 1 | 0.25 | 0.6021 | 109 | 118 | 0.63 | 0.2007 | 298 | 102 | 0.63 | 0.2007 | 298 | 102 | 2  |   | 1 |
| 52 | 65 | 2 | 1 |   | 1 | 1 | 0.63 | 0.2007 | 280 | 259 | 0.63 | 0.2007 | 307 | 250 | 1    | 0      | 324 | 358 | 5  |   | 3 |
| 53 | 38 | 1 | 0 | 1 | 2 | 1 | 0.32 | 0.4949 | 256 | 327 | 0.32 | 0.4949 | 233 | 281 | 0.25 | 0.6021 | 262 | 279 | 4  | 1 | 1 |
| 54 | 57 | 1 | 0 | 0 | 2 | 0 | 0.5  | 0.301  | 501 | 270 | 0.63 | 0.2007 | 454 | 284 | 1    | 0      | 241 | 237 | 20 | 3 | 3 |
| 55 | 55 | 1 | 0 | 1 | 1 | 0 | 0.63 | 0.2007 | 467 | 292 | 1    | 0      | 255 | 280 | 1    | 0      | 260 | 250 | 1  |   | 1 |
| 56 | 35 | 2 | 0 | 0 | 2 | 1 | 0.2  | 0.699  | 272 | 532 | 0.13 | 0.9031 | 278 | 625 | 0.32 | 0.4949 | 186 | 185 | 4  | 2 | 2 |
| 57 | 71 | 2 | 1 | 0 | 1 | 1 | 0.5  | 0.301  | 438 | 177 | 0.32 | 0.4949 | 544 | 179 | 0.2  | 0.699  | 476 | 458 | 8  |   | 4 |
| 58 | 45 | 1 | 0 | 1 | 2 | 1 | 0.5  | 0.301  | 475 | 296 | 1    | 0      | 333 | 305 | 1    | 0      | 254 | 278 | 11 | 1 | 1 |
| 59 | 47 | 2 | 0 |   | 2 | 0 | 1    | 0      | 405 | 265 | 1    | 0      | 251 | 218 | 1    | 0      | 217 | 211 | 52 | 2 | 9 |
| 60 | 65 | 1 | 0 |   | 2 | 1 | 0.8  | 0.0969 | 470 | 483 | 1    | 0      | 246 | 497 | 0.63 | 0.2007 | 226 | 227 | 26 | 1 | 5 |
| 61 | 44 | 1 | 0 |   | 1 | 1 | 1    | 0      | 512 | 439 | 1    | 0      | 292 | 463 | 1    | 0      | 292 | 292 | 2  |   | 1 |
| 62 | 30 | 1 | 1 | 0 | 2 | 1 | 1    | 0      | 392 | 514 | 1    | 0      | 221 | 447 | 1    | 0      | 220 | 221 | 2  | 1 | 1 |
| 63 | 54 | 1 | 0 | 1 | 2 | 1 | 1    | 0      | 443 | 190 | 1    | 0      | 312 | 191 | 1    | 0      | 255 | 253 | 51 | 6 | 6 |
| 64 | 53 | 1 | 1 |   | 2 | 0 | 1    | 0      | 488 | 392 | 1    | 0      | 369 | 391 | 1    | 0      | 512 | 509 | 11 | 5 | 6 |
| 65 | 57 | 2 | 1 | 0 | 2 | 1 | 0.25 | 0.6021 | 293 | 531 | 0.32 | 0.4949 | 304 | 570 | 0.32 | 0.4949 | 217 | 219 | 3  | 2 | 2 |
| 66 | 46 | 1 | 0 | 1 | 2 | 0 | 0.25 | 0.6021 | 157 | 519 | 0.32 | 0.4949 | 143 | 404 | 0.25 | 0.6021 | 157 | 168 | 18 | 1 | 1 |
| 67 | 53 | 1 | 0 | 1 | 2 | 1 | 0.32 | 0.4949 | 581 | 456 | 0.25 | 0.6021 | 412 | 442 | 0.63 | 0.2007 | 237 | 237 | 8  | 2 | 2 |
| 68 | 42 | 2 | 0 | 0 | 2 | 1 | 1    | 0      | 399 | 486 | 1    | 0      | 223 | 480 | 1    | 0      | 236 | 234 | 6  | 2 | 2 |
| 69 | 44 | 1 | 0 | 0 | 2 | 0 | 1    | 0      | 329 | 517 | 1    | 0      | 274 | 477 | 1    | 0      | 276 | 271 | 2  | 1 | 1 |
| 70 | 42 | 1 | 0 | 0 | 2 | 1 | 0.25 | 0.6021 | 493 | 515 | 0.5  | 0.301  | 268 | 496 | 1    | 0      | 235 | 238 | 7  | 2 | 2 |
| 71 | 36 | 1 | 0 |   | 2 | 1 | 0.5  | 0.301  | 439 | 441 | 0.5  | 0.301  | 251 | 409 | 0.5  | 0.301  | 256 | 424 | 7  | 1 | 2 |
| 72 | 46 | 1 | 0 |   | 2 | 1 | 0.5  | 0.301  | 411 | 186 | 0.4  | 0.3979 | 418 | 169 | 0.5  | 0.301  | 293 | 174 | 8  | 3 | 3 |
| 73 | 47 | 2 | 0 | 0 | 2 | 0 | 0.5  | 0.301  | 313 | 329 | 0.32 | 0.4949 | 217 | 341 | 1    | 0      | 210 | 292 | 27 | 1 | 1 |
| 74 | 64 | 1 | 0 | 1 | 1 | 1 | 0.2  | 0.699  | 441 | 233 | 0.2  | 0.699  | 416 | 202 | 0.63 | 0.2007 | 380 | 190 | 4  |   | 3 |
| 75 | 57 | 1 | 0 |   | 2 | 1 | 0.25 | 0.6021 | 332 | 280 | 0.5  | 0.301  | 213 | 242 | 0.5  | 0.301  | 215 | 247 | 3  | 1 | 1 |
| 76 | 47 | 1 | 0 | 0 | 1 | 1 | 1    | 0      | 334 | 262 | 1    | 0      | 283 | 247 | 1    | 0      | 283 | 247 | 7  |   | 5 |
| 77 | 51 | 1 | 0 | 0 | 2 | 1 | 0.8  | 0.0969 | 427 | 420 | 0.63 | 0.2007 | 303 | 485 | 0.5  | 0.301  | 267 | 516 | 5  | 3 | 3 |
| 78 | 58 | 1 | 0 |   | 1 | 0 | 1    | 0      | 455 | 328 | 1    | 0      | 466 | 312 | 1    | 0      | 339 | 306 | 3  |   | 3 |
